## Correction

# Correction: The Non-Classical MAP Kinase ERK3 Controls T Cell Activation

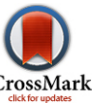

**The PLOS ONE Staff**

There are errors in Figure 5B. The same panels have been inserted twice, and the panels for 1 $\mu$ g and 3 $\mu$ g are identical. Please see the corrected Figure 5 here.

---

**Citation:** The PLOS ONE Staff (2014) Correction: The Non-Classical MAP Kinase ERK3 Controls T Cell Activation. PLoS ONE 9(8): e104727. doi:10.1371/journal.pone.0104727

**Published:** August 1, 2014

**Copyright:** © 2014 The PLOS ONE Staff. This is an open-access article distributed under the terms of the Creative Commons Attribution License, which permits unrestricted use, distribution, and reproduction in any medium, provided the original author and source are credited.

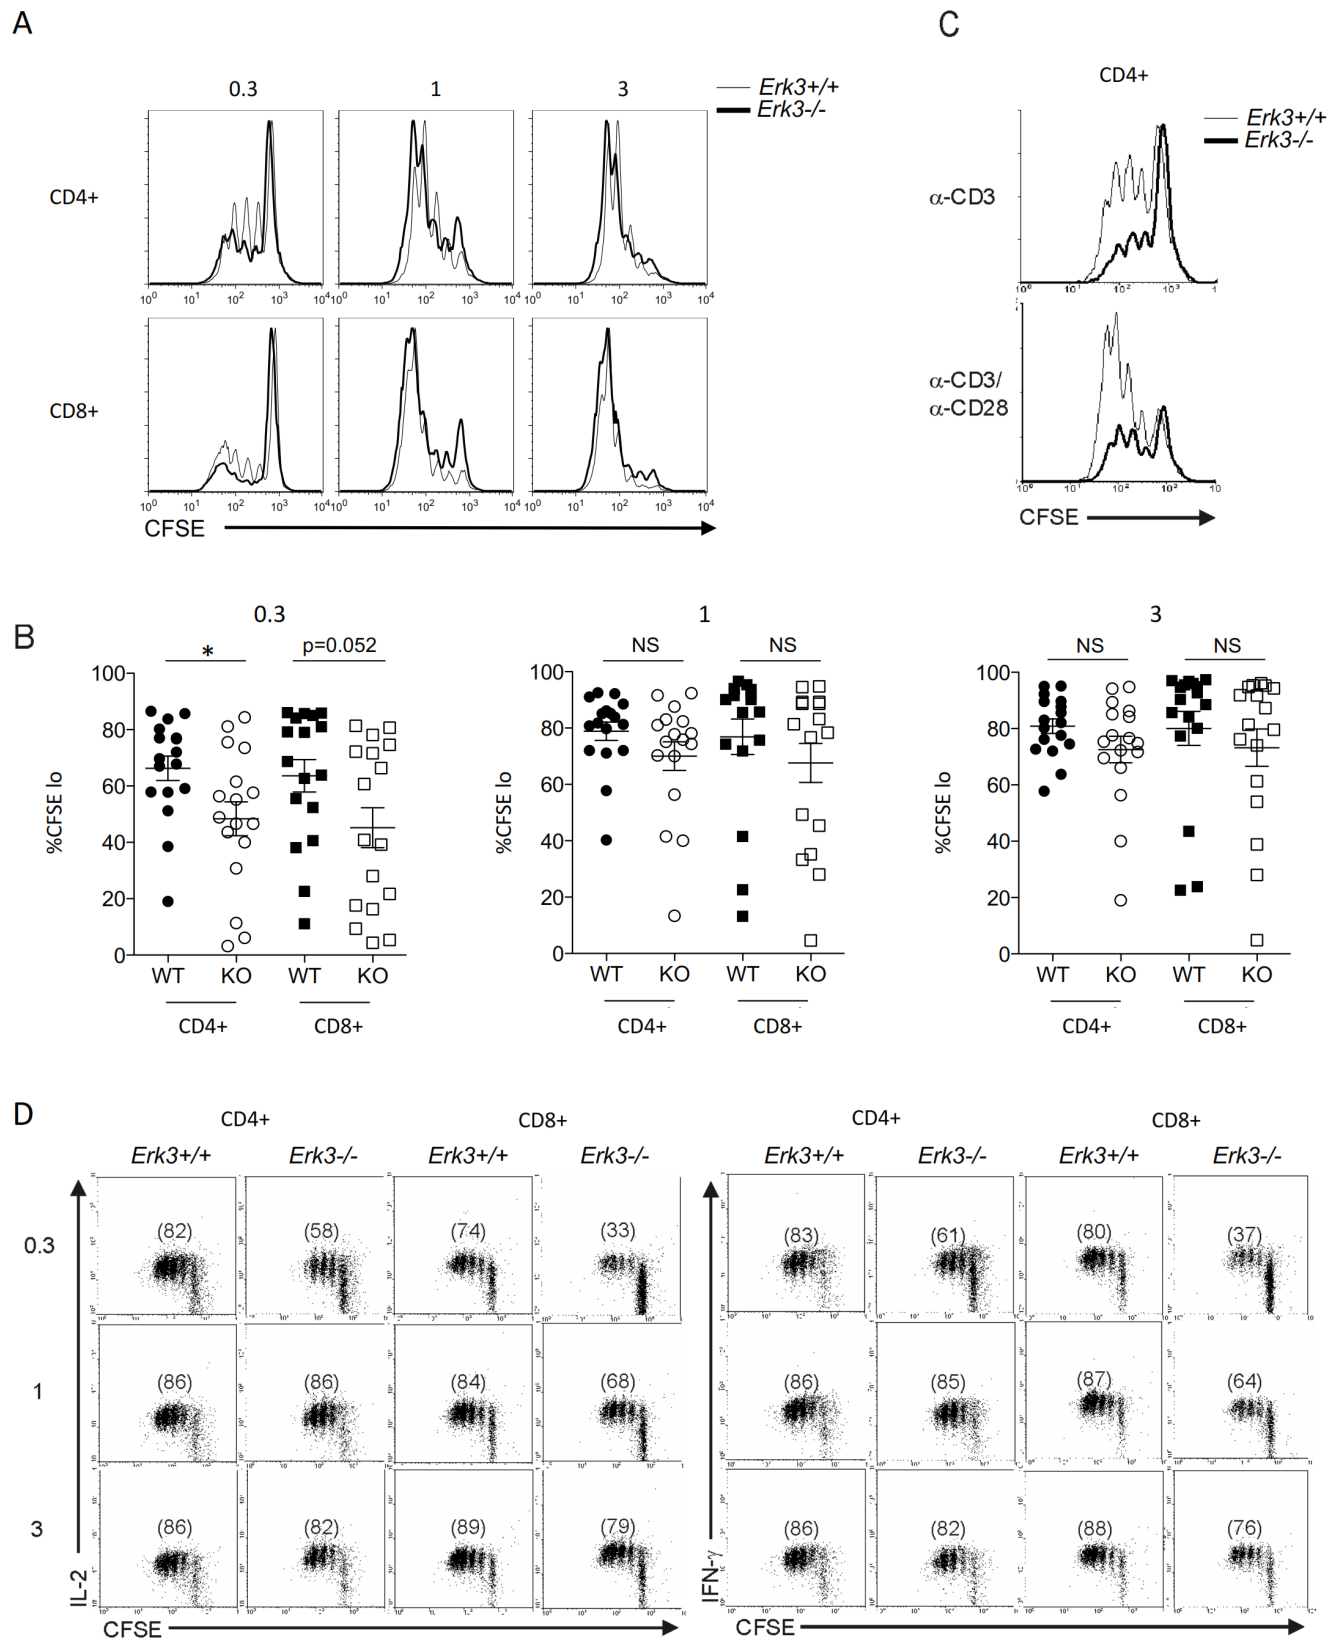

**Figure 5. Defective proliferation and cytokine production by ERK3-deficient T cells.** A, Defective proliferation of *Erk3*<sup>-/-</sup> T lymphocytes after anti-CD3 stimulation. Splenocytes from *Erk3*<sup>+/+</sup> or *Erk3*<sup>-/-</sup> hematopoietic chimeras were labeled with CFSE and stimulated with different doses of anti-CD3 Ab for 72 h. CFSE profiles gated on CD4<sup>+</sup> or CD8<sup>+</sup> T cells lacking or not ERK3 are shown for the different anti-CD3 Ab concentrations. One representative experiment is shown. B, Quantification of T cell proliferation. T cell proliferation, measured as in A, was quantified by determining the percentage of cells that have divided (one division and more; CFSE<sup>lo</sup>). Each dot represents the results from one mouse. Unpaired Student's t test (two-

sided) was used to determine statistical significance. \*  $p < 0.05$ . *C*, Addition of anti-CD28 Abs does not rescue the proliferation of ERK3-deficient CD4<sup>+</sup> T cells. Splenocytes were stimulated with a sub-optimal dose of anti-CD3 Ab (0.3  $\mu\text{g/ml}$ ) in the presence (bottom) or absence (top) of soluble anti-CD28 Ab (5  $\mu\text{g/ml}$ ). CFSE profiles gated on CD4<sup>+</sup> T cells lacking or not ERK3 are shown. *D*, Reduced production of IL-2 and IFN- $\gamma$  by ERK3-deficient T cells after anti-CD3 stimulation. After 72 h of anti-CD3 stimulation, activated T cells were stimulated with PMA and ionomycin for 4 h. Brefeldin A was added for the last 2 h of culture. IL-2 and IFN- $\gamma$  production was detected using intracellular cytokine staining. CFSE/IL-2 and CFSE/IFN- $\gamma$  profiles gated on CD4<sup>+</sup> or CD8<sup>+</sup> T lymphocytes deficient or not for ERK3 are shown for the different anti-CD3 Ab concentrations. Numbers in parenthesis represent the % of proliferating and cytokine producing cells. The results in this figure are representative of at least three independent experiments with mice from independent hematopoietic chimeras  
doi:10.1371/journal.pone.0086681.g005

## Reference

1. Marquis M, Boulet S, Mathien S, Rousseau J, Thébault P, et al. (2014) The Non-Classical MAP Kinase ERK3 Controls T Cell Activation. PLoS ONE 9(1): e86681. doi:10.1371/journal.pone.0086681
